# Supplementary material for: Admixture mapping reveals evidence of differential multiple sclerosis risk by genetic ancestry
Source: PubMed Central journal article supplement (PMC6353231; doi:10.1371/journal.pgen.1007808), 2019-01-17
Supplement: pgen.1007808.s003.pdf [file pgen.1007808.s003.pdf]

**S1 Table. Odds Ratio of MS for European Allele versus African Allele**

| HLA Allele | OR                 | P value |
|------------|--------------------|---------|
| DRB1*15:01 | 3.01 (1.90 – 4.75) | 2.49E-6 |
| DRB1*03:01 | 0.64 (0.43 – 0.96) | 3.03E-2 |
| A*02:01    | 0.91 (0.63 – 1.31) | 5.94E-1 |
| DRB1*14:01 | 0.40 (0.09 – 1.74) | 2.24E-1 |
| B*07:02    | 1.66 (1.12 – 2.47) | 1.18E-2 |
| A*03:01    | 1.54 (1.04 – 2.29) | 2.97E-2 |
| C*08:02    | 0.66 (0.29 – 1.54) | 3.37E-1 |
| C*04:01    | 1.07 (0.72 – 1.59) | 7.41E-1 |
| C*07:02    | 1.12 (0.75 – 1.67) | 5.82E-1 |

Odds ratio (OR) of European HLA allele to African HLA allele as determined from logistic regression for African American MS-associated alleles, adjusting for first 3 MDS components. OR are shown with 95% confidence interval and corresponding p-values. HLA alleles with sample size less than 50 or with predominant ancestry greater than 90% are excluded from the analysis. Furthermore, alleles not inferred to be completely European or African are excluded, and only alleles from individuals with one copy are included.
