# Supplementary material for: Admixture mapping reveals evidence of differential multiple sclerosis risk by genetic ancestry
Source: PubMed Central journal article supplement (PMC6353231; doi:10.1371/journal.pgen.1007808), 2019-01-17
Supplement: pgen.1007808.s007.pdf [file pgen.1007808.s007.pdf]

**S5 Table. Imputed African *HLA-DRB1\*15:01* SNP Subsequences in African Americans**

| SNP Subsequence                                                                                              | Counts |
|--------------------------------------------------------------------------------------------------------------|--------|
| GTAGATTGCGCTCGCTTCGACGGGGGTATTTGGGTCAAG<br>TAGGCGCGCCTGCTTAAGGTCAAACGACTAATAGCGAC<br>AGCCCTCTGGCGCAGCTCAACGC | 107    |
| CTAGATTGCGCCCGGTCTACCAGGGTACTAGGGTCAAG<br>TAGGCGCGCCTGCTTAAGGTCAAACGACTAATAGCGAC<br>AGCCCTCTGGCGCAGCTCAACGC  | 50     |
| GTAGATTGCGCTCGCTTCGACGGGGGTATTTGGGTCAAG<br>TAGGCGCGCCTGCTTAAGGTCAAACGACTAATAGCGAC<br>AGCCCTCTGGCGCAGCGACGTGT | 12     |
| GTAGATCACATCCGCTCCGCCGGGAGCCAGGTTACAG<br>TAGGCGCGCCTGCTTAAGGTCAAACGACTAATAGCGAC<br>AGCCCTCTGGCGCAGCTCAACGC   | 7      |
| CTAGATTGCGCCCGGTCTACCACGAGTACTTGGGTCAAGT<br>AGGCGCGCCTGCTTAAGGTCAAACGACTAATAGCGACA<br>GCCCTCTGGCGCAGCGACGTGT | 2      |
| CTAGATTGCGCCCGGTCTACCAGGGTACTAGGGTCAAG<br>TAGGCGCGCCTGCTTAAGGTCAAACGACTAATAGCGAC<br>AGCCCTCTGGCGCAGCGCCGTGT  | 1      |
| GTAGATTGCGCTCGCTTCGACGGGGGTATTTGGGTCAAG<br>TAGGCGCGCCTGCTTAAGGTCAAACGACTAATAGCGAC<br>AGCCCTCGGAGATCACTCAACGC | 1      |

Imputed SNPs for all African *HLA-DRB1\*15:01* alleles in African Americans. SNPs are listed left to right in order of increasing genetic coordinates. Note that imputed SNPs are not contiguous and imputation was performed by SNP2HLA.
