# Supplementary material for: Admixture mapping reveals evidence of differential multiple sclerosis risk by genetic ancestry
Source: PubMed Central journal article supplement (PMC6353231; doi:10.1371/journal.pgen.1007808), 2019-01-17
Supplement: pgen.1007808.s009.pdf [file pgen.1007808.s009.pdf]

**S7 Table. Imputed African *HLA-DRB1\*15:01* Amino Acid Subsequences in African Americans**

| Amino Acid Subsequence                                  | Counts |
|---------------------------------------------------------|--------|
| TQRTVRQMALSHSKQVVYTAQAQIYADFFVSNYFYDFRHER<br>KPQWRAVALR | 107    |
| RQRTVRHVTRSHSKHVVYTAQAQIYADFFVSNYFYDFRHER<br>KPQWRAVALR | 50     |
| TQRTVRQMALSHSKQVVYTAQAQIYADFFVSNYFYDFRHER<br>KPQWRSATLK | 12     |
| TQRMVRQVARSHAHEGVYTAQAQIYADFFVSNYFYDFRHER<br>KPQWRAVALR | 7      |
| RQRTVRHVTRSYSKQVVYTAQAQIYADFFVSNYFYDFRHER<br>KPQWRSATLK | 2      |
| RQRTVRHVTRSHSKHVVYTAQAQIYADFFVSNYFYDFRHER<br>KPQWRAATLK | 1      |
| TQRTVRQMALSHSKQVVYTAQAQIYADFFVSNYFYDFRHER<br>TSYERAVALR | 1      |

Imputed amino acids (AA) for all African *HLA-DRB1\*15:01* alleles in African Americans. AAs are listed left to right in order of increasing genetic coordinates. Note that imputed AAs are not contiguous and imputation was performed by SNP2HLA.
