# Supplementary material for: Admixture mapping reveals evidence of differential multiple sclerosis risk by genetic ancestry
Source: PubMed Central journal article supplement (PMC6353231; doi:10.1371/journal.pgen.1007808), 2019-01-17
Supplement: pgen.1007808.s018.pdf [file pgen.1007808.s018.pdf]

**Table S16. European *DRB1\*15:01–DQB1\*X* Haplotypes in African Americans**

| European <i>DRB1*15:01–DQB1*X</i> | Counts |
|-----------------------------------|--------|
| <i>HLA-DQB1*06:02</i>             | 241    |
| <i>HLA-DQB1*03:01</i>             | 28     |
| <i>HLA-DQB1*06:03</i>             | 14     |
| <i>HLA-DQB1*02:01</i>             | 10     |
| <i>HLA-DQB1*05:01</i>             | 8      |
| <i>HLA-DQB1*03:02</i>             | 6      |
| <i>HLA-DQB1*04:02</i>             | 6      |
| <i>HLA-DQB1*05:02</i>             | 5      |
| <i>HLA-DQB1*06:04</i>             | 2      |

*HLA-DQB1* alleles that European *HLA-DRB1\*15:01* is linked to in African Americans. All *HLA* alleles have frequency equal to or greater than 0.005, and there is no constraint on the ancestry of *HLA-DQB1* alleles. *X* = wildcard for any *HLA-DQB1* allele.
