# Supplementary material for: Admixture mapping reveals evidence of differential multiple sclerosis risk by genetic ancestry
Source: PubMed Central journal article supplement (PMC6353231; doi:10.1371/journal.pgen.1007808), 2019-01-17
Supplement: pgen.1007808.s020.pdf [file pgen.1007808.s020.pdf]

| SNP            | Chr. | Position (hg19) | A1 | A2 | OR   | P-value  | Prioritized genes                       |
|----------------|------|-----------------|----|----|------|----------|-----------------------------------------|
| rs6670198      | 1    | 2520527         | T  | C  | 1.14 | 1.54E-36 | MMEL1, TNFRSF14, TTC34, UBE2D3, C1orf93 |
| rs2986736      | 1    | 6512547         | C  | T  | 1.12 | 8.91E-17 | TNFRSF25                                |
| rs1801133      | 1    | 11856378        | G  | A  | 1.11 | 2.31E-15 | MTHFR, MFN2                             |
| rs67934705     | 1    | 24207504        | G  | A  | 1.07 | 4.36E-08 | HMGCL                                   |
| rs6672420      | 1    | 25291010        | A  | T  | 1.06 | 1.48E-09 | RUNX3, SYF2                             |
| chr1:32738415  | 1    | 32738415        | A  | G  | 1.13 | 1.44E-15 | LCK,F AM167B                            |
| rs72922276     | 1    | 65429319        | G  | A  | 1.16 | 1.41E-15 | JAK1, AK4, RAVR2                        |
| rs11161550     | 1    | 85682020        | G  | A  | 1.06 | 2.06E-09 | BCL10                                   |
| rs35486093     | 1    | 85729820        | G  | A  | 1.21 | 2.27E-31 | LOC646626, BCL10, C1orf52               |
| rs12133753     | 1    | 92222089        | C  | T  | 1.13 | 1.67E-16 | TGFBR3                                  |
| rs58394161     | 1    | 92939959        | C  | T  | 1.13 | 1.37E-14 |                                         |
| rs11809700     | 1    | 93152635        | T  | C  | 1.13 | 2.95E-30 | EVI5, FAM69A                            |
| rs1415069      | 1    | 93426869        | G  | C  | 1.07 | 3.32E-08 | FAM69A, GFII1, SNORA66, EVI5            |
| rs34723276     | 1    | 101290432       | A  | G  | 1.10 | 1.11E-22 | SLC30A7, DPH6                           |
| rs11578655     | 1    | 101412902       | G  | T  | 1.09 | 2.89E-08 | SLC30A7                                 |
| rs10801908     | 1    | 117090493       | C  | T  | 1.30 | 4.55E-70 | CD58                                    |
| rs483180       | 1    | 120267505       | C  | G  | 1.09 | 1.45E-17 | PHGDH                                   |
| chr1:154983036 | 1    | 154983036       | G  | T  | 1.18 | 1.67E-08 | SHC1, KCNN3, ADAM15                     |
| rs2317231      | 1    | 157686337       | G  | T  | 1.08 | 3.25E-16 | FCRL3, FCRL1, CD5L, FCRL2               |
| rs3737798      | 1    | 160389984       | A  | G  | 1.07 | 4.12E-14 | VANGL2, CASQ1, CD48                     |
| rs6427540      | 1    | 160634588       | C  | T  | 1.11 | 1.48E-09 | SLAMF1                                  |
| rs983494       | 1    | 160703965       | G  | A  | 1.09 | 6.10E-16 | SLAMF7                                  |
| rs1323292      | 1    | 192541021       | A  | G  | 1.16 | 3.64E-33 | RGS1                                    |
| rs59655222     | 1    | 200875897       | T  | C  | 1.10 | 5.66E-21 | KIF21B, C1orf106                        |
| rs9308424      | 1    | 212877776       | G  | A  | 1.09 | 9.25E-14 | BATF3, FLVCR1, UBE2D3                   |

|                |   |           |   |   |      |          |                                             |
|----------------|---|-----------|---|---|------|----------|---------------------------------------------|
| rs11899404     | 2 | 12607893  | C | T | 1.05 | 1.66E-08 | MIR4262, TRIB2                              |
| rs11125803     | 2 | 25052177  | C | T | 1.07 | 5.45E-10 | ADCY3, NCOA1                                |
| rs13414105     | 2 | 30472442  | C | A | 1.09 | 6.90E-10 | LBH                                         |
| rs12478539     | 2 | 43355324  | G | C | 1.12 | 1.65E-24 | HAAO, ZFP36L2                               |
| rs1177228      | 2 | 61242410  | G | A | 1.10 | 2.31E-19 | PUS10, AHSA2, C2orf74, USP34, KIAA1841, REL |
| rs13385171     | 2 | 65661843  | C | T | 1.07 | 3.47E-11 | ACTR2, MIR4778, SPRED2                      |
| rs12622670     | 2 | 68646536  | T | C | 1.09 | 5.08E-16 | PLEK, FBXO48                                |
| chr2:112492986 | 2 | 112492986 | C | T | 1.07 | 1.78E-12 | ANAPC1                                      |
| rs57116599     | 2 | 112770799 | G | A | 1.09 | 1.11E-11 | MERTK, TMEM87B, ANAPC1                      |
| rs10191360     | 2 | 136884679 | T | C | 1.08 | 3.85E-10 | CXCR4, THSD7B, DARS                         |
| rs962052       | 2 | 151644203 | C | T | 1.06 | 8.28E-09 | RBM43, RND3                                 |
| rs6738544      | 2 | 191989356 | C | A | 1.07 | 2.40E-13 | STAT4                                       |
| rs12614091     | 2 | 204632861 | A | T | 1.08 | 6.18E-12 | CD28                                        |
| rs35540610     | 2 | 231121829 | C | T | 1.14 | 2.98E-33 | SP140, SP110                                |
| rs9863496      | 3 | 18798848  | C | T | 1.08 | 2.75E-14 | KCNH8, SATB1                                |
| rs13327021     | 3 | 27783015  | T | C | 1.08 | 1.55E-16 | EOMES                                       |
| rs438613       | 3 | 28072086  | C | T | 1.15 | 2.31E-49 | CMC1, EOMES                                 |
| rs11919880     | 3 | 32962051  | A | G | 1.06 | 7.63E-10 | CCR4, GLB1                                  |
| rs9878602      | 3 | 71535338  | T | G | 1.10 | 1.91E-18 | FOXP1                                       |
| chr3:100848597 | 3 | 100848597 | C | T | 1.16 | 6.42E-11 | NFKBIZ, PCNP, SENP7                         |
| rs4325907      | 3 | 101749022 | C | T | 1.08 | 1.99E-09 | LOC152225, ZPLD1, SENP7                     |
| rs2289746      | 3 | 105455955 | C | T | 1.08 | 4.59E-12 | CBLB                                        |
| chr3:112693983 | 3 | 112693983 | T | G | 1.36 | 3.24E-09 | CD200R1                                     |
| rs9843355      | 3 | 119228508 | G | A | 1.15 | 4.14E-30 | ARHGAP31, TMEM39A, CD80, POGLUT1            |
| rs2331964      | 3 | 121542898 | C | T | 1.09 | 4.91E-20 | IQCB1, EAF2, SLC15A2, HCLS1                 |
| chr3:121765368 | 3 | 121765368 | C | G | 1.14 | 6.98E-43 | IQCB1                                       |
| chr3:121783015 | 3 | 121783015 | T | G | 1.12 | 8.32E-10 |                                             |

|               |   |           |   |   |      |          |                                                  |
|---------------|---|-----------|---|---|------|----------|--------------------------------------------------|
| rs6789653     | 3 | 141150990 | G | A | 1.06 | 1.30E-09 | ZBTB38, RASA2                                    |
| rs1014486     | 3 | 159691112 | C | T | 1.11 | 3.13E-28 | LINC01100, IL12A                                 |
| rs10936182    | 3 | 159712373 | T | G | 1.10 | 4.99E-08 | IL12A                                            |
| rs10936602    | 3 | 169536637 | T | C | 1.08 | 1.90E-11 | MYNN, LRRC34, LRRIQ4, LRRC31                     |
| rs2590438     | 3 | 187565968 | G | T | 1.07 | 4.65E-09 | BCL6                                             |
| rs13066789    | 3 | 187987624 | C | T | 1.07 | 1.50E-08 | LPP                                              |
| rs13136820    | 4 | 40307564  | C | T | 1.08 | 7.79E-10 |                                                  |
| rs6837324     | 4 | 48127262  | G | A | 1.07 | 1.34E-11 | TXK, TEC                                         |
| rs2705616     | 4 | 87862396  | C | G | 1.08 | 1.15E-11 | AFF1, LOC100506746                               |
| rs6533052     | 4 | 103911781 | A | G | 1.09 | 7.03E-16 | MANBA, BDH2, CENPE, CISD2, NFKB1, SLC9B2, UBE2D3 |
| rs2726479     | 4 | 106255589 | C | T | 1.07 | 3.84E-11 | PPA2, TET2                                       |
| rs9992763     | 4 | 109058718 | G | T | 1.07 | 2.36E-11 | LEF1, RPL34-AS1                                  |
| rs17051321    | 4 | 122119449 | T | C | 1.08 | 1.41E-10 | NDNF, TNIP3                                      |
| rs4361438     | 4 | 157575265 | T | C | 1.84 | 1.89E-09 |                                                  |
| rs72989863    | 4 | 164493807 | G | A | 1.07 | 5.55E-09 | MARCH1                                           |
| rs34681760    | 5 | 6712834   | C | T | 1.08 | 2.01E-11 | PAPD7                                            |
| rs10063294    | 5 | 35877505  | G | A | 1.13 | 1.58E-28 | IL7R, CAPSL                                      |
| rs11749040    | 5 | 40396425  | A | G | 1.15 | 4.54E-25 | DAB2, PTGER4                                     |
| chr5:40429250 | 5 | 40429250  | T | A | 1.07 | 1.02E-11 |                                                  |
| rs7731626     | 5 | 55444683  | G | A | 1.09 | 3.89E-15 | ANKRD55, IL6ST                                   |
| rs32658       | 5 | 118703662 | T | G | 1.06 | 3.24E-08 | HSD17B4, TNFAIP8                                 |
| rs244656      | 5 | 133449827 | A | T | 1.11 | 2.96E-14 | TCF7                                             |
| rs2084007     | 5 | 133891282 | C | T | 1.08 | 1.91E-13 | CAMLG, JADE2, TCF7, PHF15                        |
| rs249677      | 5 | 141539339 | A | C | 1.07 | 5.73E-13 | NDFIP1                                           |
| rs2546890     | 5 | 158759900 | A | G | 1.09 | 5.30E-19 | LOC285626, IL12B                                 |
| rs67111717    | 5 | 176790162 | G | A | 1.10 | 3.18E-21 | MXD3, RGS14, LMAN2                               |
| rs12211604    | 6 | 7100029   | G | A | 1.07 | 2.15E-08 | RREB1                                            |

|                |   |           |   |   |      |          |                                  |
|----------------|---|-----------|---|---|------|----------|----------------------------------|
| chr6:14691215  | 6 | 14691215  | C | T | 1.11 | 1.38E-17 | CD83, JARID2                     |
| rs719316       | 6 | 16672760  | T | C | 1.07 | 1.62E-13 | ATXN1                            |
| rs1076928      | 6 | 36348689  | T | C | 1.13 | 2.75E-19 | PXT1, ETV7, KCTD20, STK38        |
| rs72928038     | 6 | 90976768  | A | G | 1.15 | 8.38E-29 | BACH2                            |
| chr6:119215402 | 6 | 119215402 | A | C | 1.08 | 3.24E-10 | ASF1A, CEP85L, FAM184A, MCM9     |
| rs802730       | 6 | 128280104 | T | C | 1.07 | 1.08E-09 | PTPRK                            |
| rs2327586      | 6 | 135495226 | T | C | 1.11 | 9.48E-20 | ALDH8A1, HBS1L, MYB              |
| rs4896153      | 6 | 135833463 | T | A | 1.12 | 2.72E-29 | AH11, MYB                        |
| rs62420820     | 6 | 137438057 | A | G | 1.14 | 9.26E-36 | IL20RA, IL22RA2                  |
| rs631204       | 6 | 137959455 | A | C | 1.11 | 4.92E-25 |                                  |
| rs17780048     | 6 | 138179146 | C | T | 1.10 | 5.15E-12 | TNFAIP3                          |
| rs6911131      | 6 | 143865221 | G | A | 1.12 | 1.31E-10 | ADAT2, FUCA2, LOC285740, PHACTR2 |
| rs1738074      | 6 | 159465977 | C | T | 1.13 | 3.48E-35 | TAGAP, RSPH3                     |
| rs55858457     | 7 | 2443302   | T | G | 1.07 | 2.95E-08 | EIF3B, CHST12, CARD11, SDK1      |
| rs10951042     | 7 | 3139417   | C | T | 1.10 | 1.50E-18 | CARD11                           |
| rs10951154     | 7 | 27135314  | C | T | 1.08 | 3.05E-10 | HOXA1                            |
| rs10245867     | 7 | 28142186  | T | G | 1.07 | 1.22E-11 | JAZF1, JAZF1-AS1                 |
| rs60600003     | 7 | 37382465  | G | T | 1.15 | 4.60E-19 | ELMO1                            |
| rs10230723     | 7 | 50239880  | A | T | 1.09 | 7.69E-11 |                                  |
| chr7:50328339  | 7 | 50328339  | A | G | 1.09 | 2.58E-16 | C7orf72, IKZF1                   |
| rs73414214     | 7 | 105706462 | C | A | 1.13 | 6.34E-10 | SYPL1                            |
| rs4728142      | 7 | 128573967 | A | G | 1.06 | 3.37E-09 | IRF5, TNPO3, KCP                 |
| rs10271373     | 7 | 138729795 | A | C | 1.06 | 3.11E-09 | ZC3HAV1, ZC3HAV1L                |
| rs354033       | 7 | 149289464 | G | A | 1.08 | 7.99E-10 | ZNF746                           |
| rs28703878     | 8 | 79417222  | G | A | 1.11 | 5.27E-22 | ZC2HC1A, PKIA                    |
| chr8:95851818  | 8 | 95851818  | G | T | 1.15 | 3.23E-10 | TP53INP1, INTS8                  |
| rs735542       | 8 | 128175696 | A | G | 1.07 | 5.66E-13 |                                  |

|                 |    |           |   |   |      |          |                                                                                          |
|-----------------|----|-----------|---|---|------|----------|------------------------------------------------------------------------------------------|
| rs6990534       | 8  | 128814091 | G | A | 1.10 | 5.85E-20 | LINC00977, MIR1208, PCAT1, POU5F1B, PVT1                                                 |
| chr8:129177769  | 8  | 129177769 | C | T | 1.12 | 2.62E-25 |                                                                                          |
| rs3923387       | 8  | 144986793 | T | C | 1.06 | 1.76E-08 | PLEC, PARP10, SPATC1, MAF1, GRINA                                                        |
| rs7855251       | 9  | 100868189 | T | C | 1.08 | 1.23E-10 | NANS, C9orf156, TRIM14                                                                   |
| rs12722559      | 10 | 6070273   | C | A | 1.14 | 1.76E-15 |                                                                                          |
| rs11256593      | 10 | 6117322   | T | C | 1.21 | 2.96E-65 | IL2RA, IL15RA                                                                            |
| rs1399180       | 10 | 8098719   | C | T | 1.10 | 7.16E-11 | GATA3                                                                                    |
| rs1087056       | 10 | 31395761  | A | G | 1.09 | 3.50E-19 | ZEB1-AS1, ZNF438                                                                         |
| rs61863928      | 10 | 64449549  | G | T | 1.09 | 3.01E-16 | ADO                                                                                      |
| rs17741873      | 10 | 75653800  | G | T | 1.07 | 4.69E-08 | PLAU, NDST2, KIAA0913, CAMK2G                                                            |
| rs1250551       | 10 | 81059335  | T | G | 1.10 | 1.68E-23 | ZMIZ1                                                                                    |
| rs1112718       | 10 | 94479107  | A | G | 1.09 | 2.08E-17 | HHEX, IDE                                                                                |
| rs35218683      | 11 | 321138    | T | C | 1.08 | 1.36E-08 | IFITM3                                                                                   |
| rs61884005      | 11 | 14402930  | C | G | 1.10 | 6.34E-09 | RRAS2, PDE3B                                                                             |
| chr11:14868316  | 11 | 14868316  | G | A | 1.29 | 8.76E-12 | CYP2R1                                                                                   |
| rs1365120       | 11 | 36438075  | C | T | 1.10 | 4.06E-08 | PRR5L                                                                                    |
| rs2269434       | 11 | 47360412  | C | T | 1.09 | 1.47E-13 | ACP2, MADD, MYBPC3, RAPSN, DDB2, MTCH2, PSMC3, SPI1, NR1H3                               |
| rs4939490       | 11 | 60793651  | G | C | 1.12 | 2.00E-29 | CD6, CD5                                                                                 |
| rs11231749      | 11 | 64095178  | C | T | 1.07 | 1.12E-11 | VEGFB, PLCB3, CCDC88B, RPS6KA4, FKBP2, GPR137                                            |
| rs531612        | 11 | 65705432  | T | C | 1.07 | 1.21E-09 | EFEMP2, FOSL1, TSGA10IP, SART1, CTSW, SNX32, FIBP, BANF1, CCDC85B, CST6, SF3B2, C11orf68 |
| rs4409785       | 11 | 95311422  | C | T | 1.09 | 6.87E-12 | SESN3, FAM76B                                                                            |
| rs56095240      | 11 | 95421830  | A | T | 1.11 | 1.13E-09 |                                                                                          |
| rs34026809      | 11 | 118480695 | G | C | 1.09 | 7.68E-17 | TMEM25, DDX6, CXCR5                                                                      |
| rs12365699      | 11 | 118743286 | G | A | 1.12 | 2.10E-19 | TMEM25, DDX6, CXCR5                                                                      |
| rs6589706       | 11 | 118747813 | A | G | 1.11 | 4.53E-26 | DDX6, TMEM25, CXCR5                                                                      |
| chr11:118783424 | 11 | 118783424 | G | A | 1.27 | 8.76E-11 | MLL                                                                                      |
| rs6589939       | 11 | 122518525 | G | A | 1.08 | 1.75E-12 | UBASH3B                                                                                  |

|                 |    |           |   |   |      |          |                                                                     |
|-----------------|----|-----------|---|---|------|----------|---------------------------------------------------------------------|
| rs4262739       | 11 | 128421175 | G | A | 1.07 | 4.41E-12 | ETS1                                                                |
| rs1800693       | 12 | 6440009   | C | T | 1.15 | 2.24E-47 | TNFRSF1A,U47924.1                                                   |
| rs12832171      | 12 | 6441622   | C | G | 1.17 | 4.13E-10 | TNFRSF1A                                                            |
| rs2364485       | 12 | 6514963   | A | C | 1.12 | 1.51E-20 | LTBR                                                                |
| rs7977720       | 12 | 9866349   | T | C | 1.10 | 4.96E-24 | CLEC2D,CLECL1                                                       |
| rs701006        | 12 | 58106836  | G | A | 1.12 | 9.63E-31 | OS9,METTL21B,TSFM,XRCC6BP1,TSPAN31,CYP27B1,MARCH9,B4GALNT1          |
| rs61708525      | 12 | 94661453  | G | A | 1.07 | 1.80E-08 | PLXNC1                                                              |
| rs3184504       | 12 | 111884608 | T | C | 1.06 | 4.24E-11 | SH2B3,CUX2,ALDH2,HECTD4,TRAFD1                                      |
| rs7975763       | 12 | 123604053 | T | C | 1.09 | 2.99E-13 | PITPNM2,MPHOSPH9,SBNO1,CDK2AP1,OGFOD2,SETD8,SNRNP35,C12orf65,RILPL2 |
| rs9591325       | 13 | 50811220  | T | C | 1.23 | 1.26E-19 | DLEU7,ST13P4                                                        |
| rs9568402       | 13 | 50961957  | T | A | 1.09 | 4.80E-09 |                                                                     |
| chr13:100026952 | 13 | 100026952 | A | C | 1.11 | 8.98E-17 | MIR548AN,TM9SF2                                                     |
| rs11852059      | 14 | 52306091  | C | A | 1.10 | 1.19E-09 | FRMD6,GNG2                                                          |
| rs12434551      | 14 | 69253364  | A | T | 1.08 | 4.14E-17 | ZFP36L1                                                             |
| rs34695601      | 14 | 76014298  | T | C | 1.08 | 5.56E-13 | BATF,FLVCR2                                                         |
| chr14:88523488  | 14 | 88523488  | C | T | 1.33 | 1.67E-30 | GALC                                                                |
| rs12588969      | 14 | 103230758 | G | C | 1.08 | 1.82E-09 | TRAF3                                                               |
| rs12147246      | 14 | 103265844 | A | G | 1.09 | 1.98E-15 | TRAF3                                                               |
| rs62013236      | 15 | 79247482  | C | T | 1.11 | 8.53E-17 | CTSH                                                                |
| rs6496663       | 15 | 90887584  | C | A | 1.09 | 1.13E-12 | IQGAP1                                                              |
| rs405343        | 16 | 1067832   | T | G | 1.10 | 3.05E-15 | SOX8,SSTR5-AS1                                                      |
| rs2286974       | 16 | 11114512  | A | G | 1.10 | 4.09E-09 | CLEC16A,DEXI                                                        |
| chr16:11213951  | 16 | 11213951  | C | T | 1.20 | 3.70E-71 | DEXI,CLEC16A                                                        |
| chr16:11353879  | 16 | 11353879  | T | C | 1.09 | 5.01E-16 | RMI2                                                                |
| rs34947566      | 16 | 11412926  | C | A | 1.15 | 1.30E-23 | RMI2,CLEC16A                                                        |
| rs3809627       | 16 | 30103160  | C | A | 1.09 | 1.23E-21 | FAM57B,TBX6,GDPD3,INO80E,MAPK3,PPP4C,TAOK2,YPEL3,RP11-345J4.5,SEPT1 |
| rs8062446       | 16 | 57077094  | T | C | 1.09 | 4.30E-09 | NLRC5                                                               |

|            |    |          |   |   |      |          |                                                             |
|------------|----|----------|---|---|------|----------|-------------------------------------------------------------|
| rs12925972 | 16 | 79111297 | C | T | 1.11 | 1.11E-19 | DYNLRB2,WWOX                                                |
| rs17724508 | 16 | 79350204 | T | C | 1.14 | 6.07E-14 |                                                             |
| rs6564681  | 16 | 79652720 | C | T | 1.08 | 3.70E-14 |                                                             |
| rs35703946 | 16 | 86021505 | G | A | 1.13 | 2.83E-17 | IRF8,LINC01082                                              |
| rs4796224  | 17 | 34842521 | G | A | 1.09 | 1.13E-15 | MYO19,GGNBP2,DHRS11,MRM1,PIGW                               |
| rs9909593  | 17 | 37970149 | G | A | 1.08 | 8.57E-17 | IKZF3,ZPBP2,GSDMB,ORMDL3,PGAP3,GSDMA                        |
| rs883871   | 17 | 38252660 | A | G | 1.13 | 8.56E-14 | THRA,NR1D1                                                  |
| rs1026916  | 17 | 40529835 | A | G | 1.11 | 2.32E-28 | STAT3                                                       |
| rs7222450  | 17 | 43407670 | A | G | 1.06 | 2.09E-10 | MAP3K14                                                     |
| rs11079784 | 17 | 45702280 | C | T | 1.11 | 1.99E-27 | EFCAB13,TBKBP1,C17orf57,NPEPPS                              |
| rs2150879  | 17 | 57859210 | G | A | 1.12 | 4.05E-31 | TUBD1,RNFT1,HEATR6,BCAS3,VMP1,MIR21                         |
| rs9900529  | 17 | 73335776 | C | G | 1.06 | 4.76E-08 | SLC25A19,GRB2,MIF4GD,MRPS7,NUP85,CASKIN2,MYO15B,GGA3,TSEN54 |
| rs4940730  | 18 | 56269737 | A | G | 1.06 | 3.90E-10 | ALPK2                                                       |
| rs9955954  | 18 | 56348044 | A | G | 1.09 | 4.85E-11 | MALT1                                                       |
| rs2469434  | 18 | 67544046 | C | T | 1.05 | 2.92E-08 | CD226                                                       |
| rs12971909 | 19 | 4466466  | A | G | 1.07 | 5.56E-09 | CHAF1A,CTB-50L17.10,UBXN6,HDGFRP2                           |
| rs1077667  | 19 | 6668972  | C | T | 1.15 | 7.88E-33 | TNFSF14,C3                                                  |
| rs34536443 | 19 | 10463118 | G | C | 1.20 | 3.39E-11 | TYK2,ICAM3                                                  |
| rs28834106 | 19 | 10592144 | T | C | 1.12 | 3.61E-19 | PDE4A,KEAP1,KRI1,SMARCA4                                    |
| rs12609500 | 19 | 11173928 | C | T | 1.06 | 5.27E-09 | SMARCA4,ATG4D                                               |
| rs58166386 | 19 | 16559421 | G | A | 1.11 | 4.42E-24 | CALR3,C19orf44,EPS15L1                                      |
| rs4808760  | 19 | 18301979 | C | G | 1.12 | 5.83E-25 | IFI30,MPV17L2,PDE4C,KIAA1683,MAST3                          |
| rs7260482  | 19 | 45143942 | C | A | 1.08 | 1.43E-09 | PVR                                                         |
| rs11083862 | 19 | 47638539 | A | T | 1.08 | 2.44E-09 | HIF3A                                                       |
| rs1465697  | 19 | 49837246 | T | C | 1.10 | 3.02E-18 | DKKL1,CD37,TEAD2,SLC6A16                                    |
| rs4812492  | 20 | 39938122 | C | T | 1.07 | 2.83E-06 | LPIN3,PLCG1,TOP1                                            |
| rs4812772  | 20 | 42579051 | C | T | 1.07 | 6.17E-09 | TOX2                                                        |

|           |    |           |   |   |      |                       |                                   |
|-----------|----|-----------|---|---|------|-----------------------|-----------------------------------|
| rs6032662 | 20 | 44734310  | C | T | 1.10 | 5.28E-19              | SLC12A5,CD40,NCOA5                |
| rs6020055 | 20 | 48422095  | A | G | 1.06 | 5.12E-08              | B4GALT5,SLC9A8                    |
| rs2585447 | 20 | 52744437  | C | T | 1.09 | 3.13E-10              |                                   |
| rs2248137 | 20 | 52789743  | C | G | 1.09 | 1.92E-19              | CYP24A1,BCAS1                     |
| rs6742    | 20 | 62374441  | C | T | 1.15 | 4.11E-14              | ZGPAT                             |
| rs9808753 | 21 | 34787312  | G | A | 1.08 | 1.60E-09              | IFNGR2,TMEM50B,ITSN1              |
| rs2836438 | 21 | 39864727  | A | G | 1.11 | 2.62E-10              | TMPRSS3,ERG                       |
| rs9610458 | 22 | 22205353  | T | C | 1.09 | 1.16E-19              | TOP3B,PPM1F,MAPK1                 |
| rs4820955 | 22 | 31622539  | A | T | 1.07 | 1.06E-08              | PIK3IP1,PISD,SFI1,LIMK2           |
| rs760517  | 22 | 37258986  | C | T | 1.07 | 5.22E-11              | NCF4,PVALB,CSF2RB                 |
| rs5756405 | 22 | 37310954  | A | G | 1.06 | 5.35E-11              | NCF4,CSF2RB                       |
| rs137955  | 22 | 40291807  | T | C | 1.06 | 9.63E-09              | GRAP2,ENTHD1                      |
| rs140522  | 22 | 50971266  | T | C | 1.12 | 1.31E-21              | SCO2,TYMP,CHKB,NCAPH2,CPT1B,ODF3B |
| rs2807267 | X  | 135666453 | T | G | 1.07 | 6.86x10 <sup>-9</sup> | RNU6-320P                         |
