# Supplementary material for: Admixture mapping reveals evidence of differential multiple sclerosis risk by genetic ancestry
Source: PLoS Genet. 2019 Jan 17;15(1):e1007808. doi: 10.1371/journal.pgen.1007808 (PMC6353231; doi:10.1371/journal.pgen.1007808)
Supplement: S23 Table — Supporting information for Fig 5. (XLSX) [file pgen.1007808.s025.xlsx]

## Sheet: African Americans
HLA_allele

## Sheet: Hispanics
HLA_allele

## Sheet: Asians
HLA_allele
